# Supplementary material for: Expression Analyses of Genes Related to Multixenobiotic Resistance in Mytilus galloprovincialis after Exposure to Okadaic Acid-Producing Dinophysis acuminata
Source: MDPI journal article supplement (doi:10.3390/toxins13090614), 2021-09-01
Supplement: s1 [file s1]

# Supplementary Materials: Expression Analyses of Genes Related to Multixenobiotic Resistance in *Mytilus galloprovincialis* after Exposure to Okadaic Acid-Producing *Dinophysis acuminata*

Roi Martínez-Escauriaza, Vanessa Lozano, M. Luz Pérez-Parallé, Juan Blanco, José L. Sánchez and Antonio J. Pazos

**Table S1.** Rank of candidate reference genes in quantitative real-time reverse transcription–polymerase chain reaction (RT–qPCR), calculated by geNorm, NormFinder, and BestKeeper analysis.

| Digestive gland (DG) |                            |           |                           |           |                           |      |                           |      |              |
|----------------------|----------------------------|-----------|---------------------------|-----------|---------------------------|------|---------------------------|------|--------------|
| Rank                 | GeNorm                     | average M | Normfinder                | Stability | BestKeeper                | r    | BestKeeper                | SD   | Overall      |
| 1                    | <i>gapdh</i> / <i>rps4</i> | 0.56      | <i>gapdh</i>              | 0.088     | <i>gapdh</i>              | 0.78 | <i>gapdh</i>              | 0.76 | <i>gapdh</i> |
| 2                    | <i>gapdh</i> / <i>rps4</i> | 0.56      | <i>rps4</i>               | 0.105     | <i>rps4</i>               | 0.77 | <i>cox1</i>               | 0.84 | <i>rps4</i>  |
| 3                    | <i>cox1</i>                | 0.9       | <i>cox1</i>               | 0.150     | <i>tif5a</i>              | 0.71 | <i>rps4</i>               | 0.88 | <i>cox1</i>  |
| 4                    | <i>act</i>                 | 1.07      | <i>tif5a</i>              | 0.180     | <i>act</i>                | 0.67 | <i>18S</i>                | 1.06 | <i>tif5a</i> |
| 5                    | <i>tif5a</i>               | 1.17      | <i>rps27</i> / <i>act</i> | 0.188     | <i>rps27</i> / <i>nd4</i> | 0.58 | <i>rps27</i>              | 1.11 | <i>act</i>   |
| 6                    | <i>rps27</i>               | 1.26      | <i>rps27</i> / <i>act</i> | 0.188     | <i>rps27</i> / <i>nd4</i> | 0.58 | <i>act</i>                | 1.12 | <i>rps27</i> |
| 7                    | <i>18S</i>                 | 1.41      | <i>18S</i>                | 0.200     | <i>cox1</i>               | 0.52 | <i>tif5a</i>              | 1.19 | <i>18s</i>   |
| 8                    | <i>nd4</i>                 | 1.69      | <i>nd4</i>                | 0.318     | <i>18S</i>                | 0.38 | <i>nd4</i>                | 2.15 | <i>nd4</i>   |
| Gill (GI)            |                            |           |                           |           |                           |      |                           |      |              |
| Rank                 | GeNorm                     | average M | Normfinder                | Stability | BestKeeper                | r    | BestKeeper                | SD   | Overall      |
| 1                    | <i>gapdh</i> / <i>rps4</i> | 0.63      | <i>cox1</i>               | 0.088     | <i>cox1</i> / <i>rps4</i> | 0.87 | <i>cox1</i>               | 0.56 | <i>rps4</i>  |
| 2                    | <i>gapdh</i> / <i>rps4</i> | 0.63      | <i>rps4</i>               | 0.092     | <i>cox1</i> / <i>rps4</i> | 0.87 | <i>rps4</i>               | 0.67 | <i>cox1</i>  |
| 3                    | <i>cox1</i>                | 0.73      | <i>gapdh</i>              | 0.093     | <i>rps27</i>              | 0.86 | <i>gapdh</i> / <i>18S</i> | 0.78 | <i>gapdh</i> |
| 4                    | <i>act</i>                 | 0.82      | <i>act</i>                | 0.106     | <i>gapdh</i>              | 0.84 | <i>gapdh</i> / <i>18S</i> | 0.78 | <i>act</i>   |
| 5                    | <i>rps27</i>               | 0.88      | <i>tif5a</i>              | 0.136     | <i>act</i>                | 0.81 | <i>rps27</i>              | 0.87 | <i>rps27</i> |
| 6                    | <i>tif5a</i>               | 1         | <i>rps27</i>              | 0.137     | <i>tif5a</i>              | 0.77 | <i>act</i>                | 0.90 | <i>tif5a</i> |
| 7                    | <i>nd4</i>                 | 1.08      | <i>nd4</i>                | 0.139     | <i>nd4</i>                | 0.65 | <i>nd4</i>                | 0.92 | <i>nd4</i>   |
| 8                    | <i>18S</i>                 | 1.16      | <i>18S</i>                | 0.188     | <i>18S</i>                | 0.33 | <i>tif5a</i>              | 1.08 | <i>18S</i>   |
| Mantle (MT)          |                            |           |                           |           |                           |      |                           |      |              |
| Rank                 | GeNorm                     | average M | Normfinder                | Stability | BestKeeper                | r    | BestKeeper                | SD   | Overall      |
| 1                    | <i>gapdh</i> / <i>rps4</i> | 0.8       | <i>rps4</i>               | 0.094     | <i>rps4</i>               | 0.76 | <i>18S</i>                | 0.89 | <i>rps4</i>  |
| 2                    | <i>gapdh</i> / <i>rps4</i> | 0.8       | <i>rps27</i>              | 0.114     | <i>tif5a</i>              | 0.74 | <i>rps4</i>               | 0.97 | <i>gapdh</i> |
| 3                    | <i>rps27</i>               | 1.06      | <i>gapdh</i>              | 0.117     | <i>rps27</i>              | 0.70 | <i>gapdh</i>              | 1.15 | <i>rps27</i> |
| 4                    | <i>act</i>                 | 1.2       | <i>18S</i>                | 0.118     | <i>gapdh</i>              | 0.69 | <i>rps27</i>              | 1.18 | <i>tif5a</i> |
| 5                    | <i>tif5a</i>               | 1.34      | <i>cox1</i>               | 0.126     | <i>act</i> / <i>18S</i>   | 0.68 | <i>tif5a</i>              | 1.25 | <i>18S</i>   |
| 6                    | <i>18S</i>                 | 1.43      | <i>act</i>                | 0.149     | <i>act</i> / <i>18S</i>   | 0.68 | <i>cox1</i>               | 1.32 | <i>act</i>   |
| 7                    | <i>cox1</i>                | 1.55      | <i>tif5a</i>              | 0.172     | <i>cox1</i>               | 0.65 | <i>act</i>                | 1.42 | <i>cox1</i>  |
| 8                    | <i>nd4</i>                 | 1.89      | <i>nd4</i>                | 0.339     | <i>nd4</i>                | 0.49 | <i>nd4</i>                | 2.37 | <i>nd4</i>   |
